# Supplementary material for: Iron(ii)–bis(isonitrile) complexes: novel catalysts in asymmetric transfer hydrogenations of aromatic and heteroaromatic ketones
Source: Royal Society of Chemistry journal article supplement (doi:10.1039/c0cc00508h), 2010-01-01
Supplement: addcorr.doc [file addcorr.doc]

Addition and Correction for ChemComm:

**Iron(II)–bis(isonitrile) complexes: novel catalysts in asymmetric transfer hydrogenations of aromatic and heteroaromatic ketones**

Anu Naik, Tapan Maji and Oliver Reiser

*Chem. Commun.,* 2010, **46**, 4475–4477 (DOI: 10.1039/c0cc00508h)

Upon describing our experiments for the iron catalyzed asymmetric transfer hydrogenation (ASH) of cyclic pyridyl ketones, we did not correctly describe the state of the art for this class of compounds in ASHs. The ruthenium catalyzed ASH of such a compound has been described before (F. K. Cheung, C. Lin, F. Minissi, A. L. Crivillé, M .A Graham, D. J. Fox and M. Wills, *Org. Lett.* 2007, **9**, 4659–4662). Moreover, the ASH of acyclic pyridyl ketones with ruthenium catalysts has been reported several times before. For a leading reference see K. Okano, K. Murata and T. Ikariya, *Tetrahedron Lett.* 2000, **41**, 9277–9280.

We thank Prof. M. Wills, University of Warwick, UK, for bringing this matter to our attention.

The Royal Society of Chemistry apologises for this error and any consequent inconvenience to authors and readers.

**Additions and corrections can be viewed online by accessing the original article to which they apply.**
